# Supplementary material for: Effect of Didactic Training on Barriers and Biases to Treatment of Opioid Use Disorder: Meeting the Ongoing Needs of Patients with Opioid Use Disorder in the Emergency Department during the COVID-19 Pandemic
Source: MDPI journal article supplement (doi:10.3390/healthcare10122393), 2022-11-29

Supplement: Figure S1. Medication for Opioid Use Disorder Delivery Pre- and Post-Training (n=159,606 ED visits)

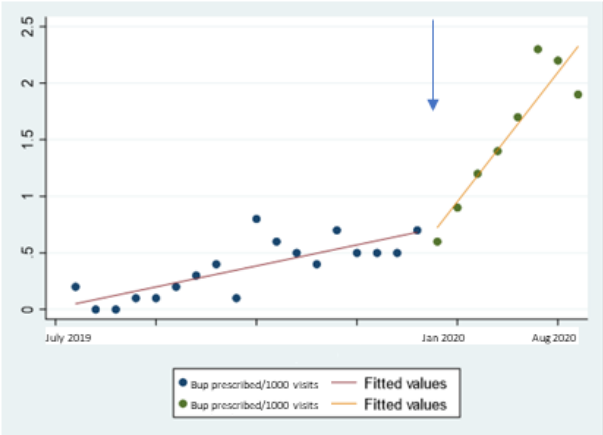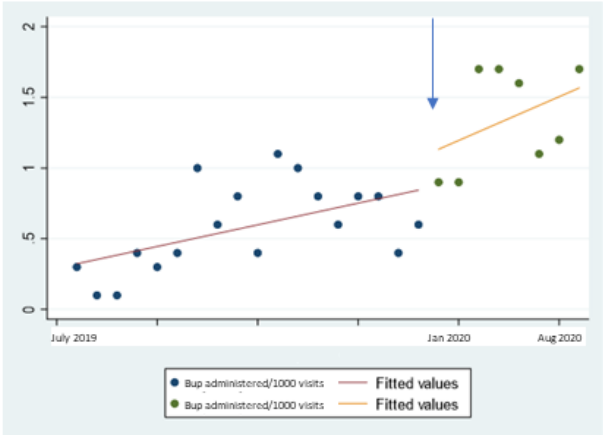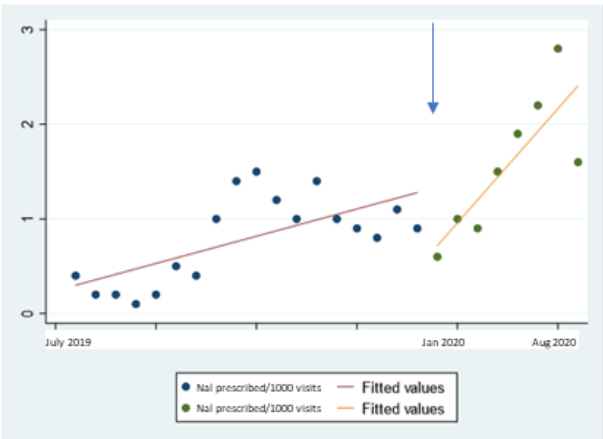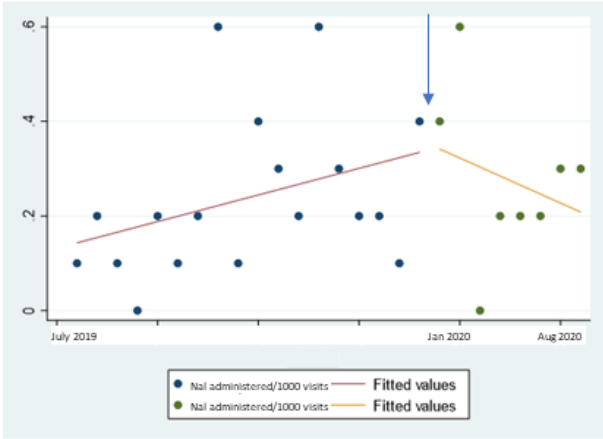

Supplement: s1 [file s1]
